# Supplementary material for: A Retrospective Cross-Sectional Study on the Risk of Getting Sick with COVID-19, the Course of the Disease, and the Impact of the National Vaccination Program against SARS-CoV-2 on Vaccination among Health Professionals in Poland
Source: MDPI journal article supplement (doi:10.3390/ijerph19127231), 2022-06-13
Supplement: s1 [file s1]

**Figure S1.** Sociodemographic characteristics of participants.

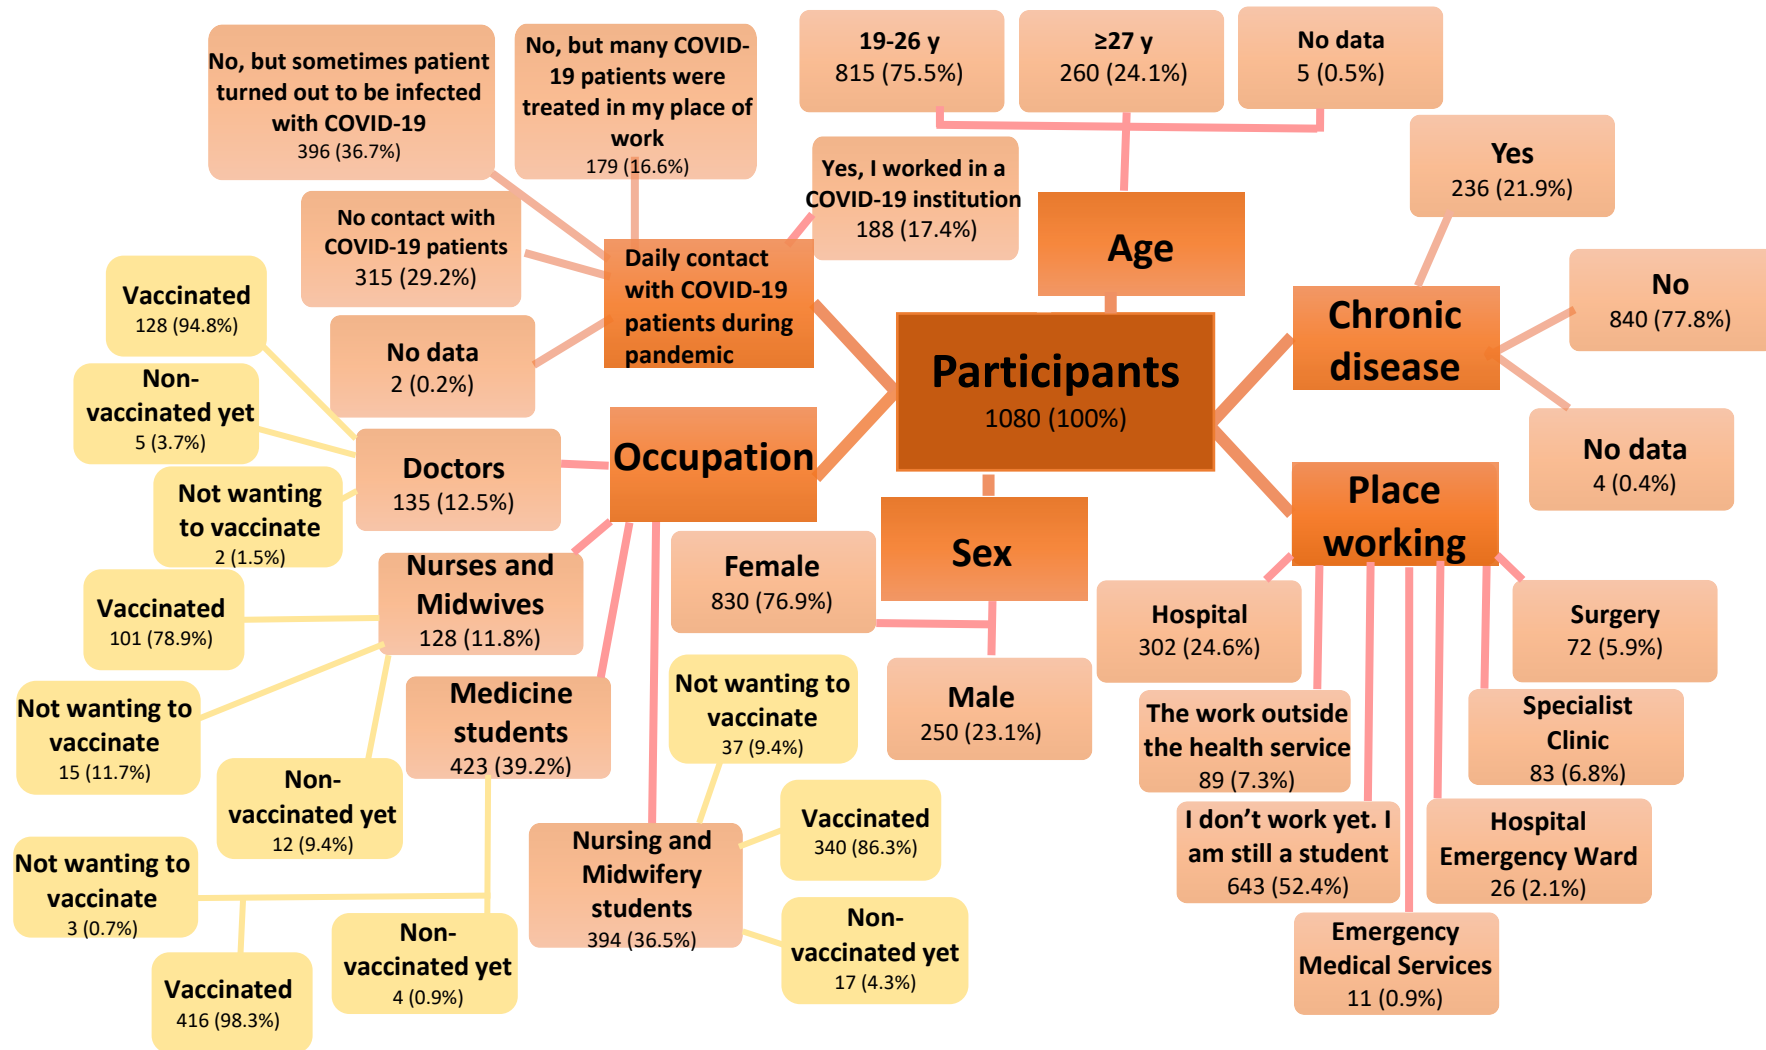

**Table S1.** The survey questionnaire.

| Questions                                                                                                                 | Answers                                                                                                                                                                                                                                                                                                                                                                        |
|---------------------------------------------------------------------------------------------------------------------------|--------------------------------------------------------------------------------------------------------------------------------------------------------------------------------------------------------------------------------------------------------------------------------------------------------------------------------------------------------------------------------|
| Did you take the COVID-19 vaccine?                                                                                        | <ul style="list-style-type: none"> <li>• Yes</li> <li>• No, but I intend to take it in the near future</li> <li>• No, I don't want to take the COVID-19 vaccine</li> </ul>                                                                                                                                                                                                     |
| Do you think you are in the group of a "high risk to get COVID-19"?                                                       | <ul style="list-style-type: none"> <li>• Yes, as I am a health service employee</li> <li>• Yes, as I work in a large group of people</li> <li>• Yes, as I have chronic illnesses</li> <li>• Yes, because of age</li> <li>• No, I am not at risk</li> </ul>                                                                                                                     |
| Did you feel more stressed doing your job (internship, classes at university) because of the COVID-19 pandemic?           | <ul style="list-style-type: none"> <li>• No, it didn't matter to me.</li> <li>• No, but I was always stressed</li> <li>• Yes, a little higher</li> <li>• Definitely yes, the stress level was much higher than usual.</li> </ul>                                                                                                                                               |
| Were you tested on COVID-19 during the last year due to the possible contact with an infected person?                     | <ul style="list-style-type: none"> <li>• Yes, many times (more than 3)</li> <li>• Yes, several times (2-3)</li> <li>• Yes, it happened once</li> <li>• No.</li> </ul>                                                                                                                                                                                                          |
| Were you ill with COVID-19?                                                                                               | <ul style="list-style-type: none"> <li>• Yes</li> <li>• No</li> </ul>                                                                                                                                                                                                                                                                                                          |
| Because of COVID-19:                                                                                                      | <ul style="list-style-type: none"> <li>• I was in hospital and had to use the life-supporting machine</li> <li>• I was in hospital, but there was no need to use the life-supporting machine</li> <li>• I was seriously ill, but there was no need to go to hospital</li> <li>• I had mild infection</li> <li>• I didn't have any symptoms (asymptomatic infection)</li> </ul> |
| Did any member of your family or any of your friends who caught the COVID-19 (more than one answer possible)              | <ul style="list-style-type: none"> <li>• died</li> <li>• was seriously ill</li> <li>• has or had complications</li> <li>• was ill, but is OK now and back to their normal activity</li> <li>• No, nobody among my family or friends had COVID-19</li> </ul>                                                                                                                    |
| Did the Government Campaign for the National Vaccine Program have any influence on your decision to take the vaccine?     | <ul style="list-style-type: none"> <li>• Definitely yes</li> <li>• No, I was going to take the vaccine any way</li> <li>• It didn't matter to me</li> <li>• No, I wasn't interested in this campaign</li> <li>• Definitely no, the campaign wasn't very reliable in my opinion</li> </ul>                                                                                      |
| Where did you usually get the information about the vaccination and the offered vaccines? (more than one answer possible) | <ul style="list-style-type: none"> <li>• academic lectures, medical literature, conferences, other courses</li> <li>• health professionals</li> <li>• the Internet, the sites dedicated to COVID-19</li> <li>• friends, also the social media</li> <li>• radio, television, press</li> <li>• others, please give an example.....</li> </ul>                                    |

|                                                                                                                                                   |                                                                                                                                                                                                                                                                                                                                                                                   |
|---------------------------------------------------------------------------------------------------------------------------------------------------|-----------------------------------------------------------------------------------------------------------------------------------------------------------------------------------------------------------------------------------------------------------------------------------------------------------------------------------------------------------------------------------|
| How do you rate the reliability of the different sources offering information about vaccinations?<br>(Please put an X next to the chosen answer). | <ul style="list-style-type: none"> <li>• Very reliable (5)</li> <li>• Reliable (4)</li> <li>• I don't know (3)</li> <li>• Not very reliable (2)</li> <li>• Unreliable (1)</li> </ul>                                                                                                                                                                                              |
| If the COVID-19 vaccination was recommended to be taken every year, should it be obligatory for the health professionals in your opinion?         | <ul style="list-style-type: none"> <li>• Yes, it should be obligatory</li> <li>• Yes, it should be obligatory, if it is free of charge</li> <li>• No, it should be voluntary</li> </ul>                                                                                                                                                                                           |
| Sex                                                                                                                                               | <ul style="list-style-type: none"> <li>• Woman</li> <li>• Man</li> </ul>                                                                                                                                                                                                                                                                                                          |
| Age                                                                                                                                               | <ul style="list-style-type: none"> <li>• in years .....</li> </ul>                                                                                                                                                                                                                                                                                                                |
| Do you have any chronic diseases?                                                                                                                 | <ul style="list-style-type: none"> <li>• Yes</li> <li>• No</li> </ul>                                                                                                                                                                                                                                                                                                             |
| Occupation                                                                                                                                        | <ul style="list-style-type: none"> <li>• Nurse/ Midwife</li> <li>• Doctor</li> <li>• Nursing/ Midwifery student</li> <li>• Medicine student</li> </ul>                                                                                                                                                                                                                            |
| Job/ study seniority                                                                                                                              | <ul style="list-style-type: none"> <li>• (in years).....</li> </ul>                                                                                                                                                                                                                                                                                                               |
| Place of work (you can chose several)                                                                                                             | <ul style="list-style-type: none"> <li>• Hospital</li> <li>• Outpatient clinic</li> <li>• Specialist clinic</li> <li>• Hospital Emergency Ward</li> <li>• Emergency</li> <li>• The work outside the health service</li> <li>• I don't work yet, I am still a student</li> </ul>                                                                                                   |
| Did you have daily contact with COVID-19 patients during the pandemic?                                                                            | <ul style="list-style-type: none"> <li>• Yes, I worked in an institution which is or temporarily was turned into a COVID-19 institution</li> <li>• No, but many COVID-19 patients were treated in my place of work</li> <li>• No, but it sometimes turned out later that the patient was infected with COVID-19</li> <li>• No, I had no contact with COVID-19 patients</li> </ul> |

**Table S2.** Sources of information on COVID-19.

|                                               | <b>N and NS</b> | <b>D and MS</b> | <b><i>p</i></b> |
|-----------------------------------------------|-----------------|-----------------|-----------------|
| Academic lectures, medical literature etc.    | 151 (19.9%)     | 338 (39.3%)     | <0.001          |
| Health professionals                          | 244 (32.2%)     | 225 (26.2%)     | 0.008           |
| The Internet, the sites dedicated to COVID-19 | 236(31.1%)      | 229 (26.7%)     | 0.051           |
| Friends. also social media                    | 47 (6.2%)       | 29 (3.4%)       | 0.008           |
| Radio. television. press                      | 77 (10.2%)      | 38 (4.4%)       | <0.001          |
| Total                                         | 758 (100%)      | 859 (100%)      |                 |

D- Doctors, N- Nurses and Midwives, MS – Medical Students, NS - Nursing and Midwifery students.

**Table S3.** Associations between characteristics of subjects (sex, age, occupation, seniority, exposure to COVID in workplace) and decision about vaccination.

|                                                                   | V   | NWV | Univariate Logistic Regression |          | Multivariate Logistic Regression |          |
|-------------------------------------------------------------------|-----|-----|--------------------------------|----------|----------------------------------|----------|
|                                                                   |     |     | OR 95%CI                       | <i>p</i> | OR 95%CI                         | <i>p</i> |
| Sex                                                               |     |     |                                |          |                                  |          |
| Male                                                              | 237 | 6   | 1.00 Ref.                      |          |                                  |          |
| Female                                                            | 748 | 51  | 0.37 (0.16-0.88)               | 0.019    | 1.51 (0.56-4.08)                 | 0.418    |
| Age                                                               |     |     |                                |          |                                  |          |
| ≥27 year                                                          | 228 | 17  | 1.00 Ref.                      |          |                                  |          |
| 19-26 year                                                        | 757 | 39  | 1.45 (0.80-2.61)               | 0.216    | 1.82 (0.88-3.74)                 | 0.105    |
| Chronic disease                                                   |     |     |                                |          |                                  |          |
| Yes                                                               | 211 | 16  | 1.00 Ref.                      |          |                                  |          |
| No                                                                | 774 | 41  | 0.70 (0.38-1.27)               | 0.237    | 0.73 (0.38-1.40)                 | 0.347    |
| Occupation                                                        |     |     |                                |          |                                  |          |
| D+MS                                                              | 441 | 5   | 1.00 Ref.                      |          |                                  |          |
| N+NS                                                              | 544 | 52  | 0.12 (0.05-0.30)               | <0.001   | 0.07 (0.02-0.18)                 | <0.001   |
| Seniority                                                         |     |     |                                |          |                                  |          |
| Junior                                                            | 341 | 27  | 1.00 Ref.                      |          |                                  |          |
| Senior                                                            | 644 | 30  | 1.70 (0.99-2.91)               | 0.050    | 1.10 (0.60-2.0)                  | 0.749    |
| Exposure to COVID                                                 |     |     |                                |          |                                  |          |
| Yes, I worked in a COVID-19 institution                           | 286 | 20  | 0.54 (0.27-1.09)               | 0.083    | 1.28 (0.54-3.05)                 | 0.571    |
| No, but many COVID-19 patients were treated in my place of work   | 168 | 13  | 0.49 (0.23-1.07)               | 0.067    | 1.72 (0.69-4.26)                 | 0.245    |
| No, but sometimes patient turned out to be infected with COVID-19 | 161 | 9   | 0.68 (0.29-1.60)               | 0.373    | 1.82 (0.87-3.84)                 | 0.111    |
| No contact with COVID-19 patients                                 | 369 | 14  | 1.00 Ref.                      |          |                                  |          |

D- Doctors, N- Nurses and Midwives , MS – Medical Students, NS - Nursing and Midwifery students; Junior- first years of study (1-3 for MS, 1 for NS) / up to 10 years inclusive of work in the profession; Senior- last years of study (4-6 years for MS, 2-3 years for NS) / more than 10 years of work in the profession; V-vaccinated, NWV – not wanting to vaccinated.

**Table S4. Associations between possible decision-making factors and decision of vaccination.**

|                                                            | Vaccinated | Not wanting to<br>vaccinate | Univariate Logistic Regression |          | Multivariate Logistic Regression |          |
|------------------------------------------------------------|------------|-----------------------------|--------------------------------|----------|----------------------------------|----------|
|                                                            |            |                             | OR 95%CI                       | <i>p</i> | OR 95%CI                         | <i>p</i> |
| High risk group                                            |            |                             |                                |          |                                  |          |
| Yes, a health service employee                             | 467        | 19                          | 1.62 (0.88-2.99)               | 0.118    | 1.24 (0.58-2.67)                 | 0.581    |
| Yes, work in a large group of people                       | 149        | 11                          | 0.89 (0.43-1.86)               | 0.764    | 0.54 (0.21-1.36)                 | 0.190    |
| Yes, chronic illnesses                                     | 55         | 2                           | 1.81 (0.42-7.87)               | 0.420    | 0.99 (0.16-6.03)                 | 0.993    |
| Yes, because of age                                        | 19         | 2                           | 0.63 (0.14-2.84)               | 0.541    | 1.34 (0.13-14.22)                | 0.807    |
| No                                                         | 379        | 25                          | 1.00 Ref.                      |          |                                  |          |
| Suffered from COVID-19                                     |            |                             |                                |          |                                  |          |
| Yes                                                        | 247        | 20                          | 1.00 Ref.                      |          |                                  |          |
| No                                                         | 738        | 38                          | 1.57 (0.90-2.75)               | 0.111    | 5.20 (1.61-16.74)                | 0.006    |
| Symptom of COVID-19                                        |            |                             |                                |          |                                  |          |
| I was in hospital or seriously ill without hospitalization | 56         | 2                           | 7.23 (1.44-36.17)              | 0.007*   | 5.59 (0.70-44.88)                | 0.105*   |
| Mild infection                                             | 162        | 10                          | 4.18 (1.53-11.43)              | 0.003    | 7.58 (1.86-30.93)                | 0.005    |
| Asymptomatic infection                                     | 31         | 8                           | 1.00 Ref.                      |          |                                  |          |
| COVID-19 disease of relatives                              |            |                             |                                |          |                                  |          |
| Died                                                       | 133        | 3                           | 3.55 (1.03-12.15)              | 0.032    | 4.45 (1.00-19.83)                | 0.051    |
| Seriously illness                                          | 180        | 6                           | 2.40 (0.94-6.10)               | 0.058    | 1.36 (0.42-4.37)                 | 0.607    |
| Illness and after complications                            | 133        | 5                           | 2.13 (0.78-5.80)               | 0.132    | 1.56 (0.45-5.34)                 | 0.481    |
| Illness, but is OK now                                     | 439        | 26                          | 1.35 (0.74-2.47)               | 0.327    | 0.84 (0.41-1.72)                 | 0.634    |
| Nobody was ill                                             | 250        | 20                          | 1.00 Ref.                      |          |                                  |          |
| High stress                                                |            |                             |                                |          |                                  |          |
| No, it didn't matter to me                                 | 251        | 29                          | 1.00 Ref.                      |          |                                  |          |
| No, but I am always stressed                               | 210        | 10                          | 2.43 (1.16-5.09)               | 0.016    | 4.10 (1.56-10.78)                | 0.004    |
| Yes, higher                                                | 519        | 18                          | 3.33 (1.82-6.11)               | <0.001   | 2.80 (1.25-6.25)                 | 0.012    |
| COVID-19 test                                              |            |                             |                                |          |                                  |          |
| Yes, many times (>3)                                       | 180        | 10                          | 1.16 (0.56-2.42)               | 0.684    | 0.98 (0.34-2.84)                 | 0.977    |
| Yes, several times (2-3)                                   | 147        | 5                           | 1.90 (0.73-4.97)               | 0.183    | 1.05 (0.32-3.44)                 | 0.942    |
| Yes, once                                                  | 158        | 10                          | 1.02 (0.49-2.12)               | 0.955    | 0.52 (0.19-1.46)                 | 0.218    |

|                                                                                                                                                                                                                       |     |    |                    |         |                    |        |
|-----------------------------------------------------------------------------------------------------------------------------------------------------------------------------------------------------------------------|-----|----|--------------------|---------|--------------------|--------|
| No                                                                                                                                                                                                                    | 495 | 32 | 1.00 Ref.          |         |                    |        |
| Influence of Government Campaign on vaccination decision                                                                                                                                                              |     |    |                    |         |                    |        |
| Yes                                                                                                                                                                                                                   | 68  | 3  | 2.02 (0.54-7.61)   | 0.288*  | 3.11 (0.64-15.23)  | 0.161  |
| No, I was going to take the vaccine any way                                                                                                                                                                           | 459 | 3  | 13.7 (3.70-50.46)  | <0.001* | 12.35 (2.97-51.35) | 0.001* |
| It didn't matter to me                                                                                                                                                                                                | 112 | 10 | 1.00 Ref.          |         |                    |        |
| I wasn't interested in this campaign                                                                                                                                                                                  | 246 | 18 | 1.22 (0.55-2.73)   | 0.627   | 1.93 (0.72-5.13)   | 0.190  |
| The information wasn't too reliable in my opinion                                                                                                                                                                     | 98  | 22 | 0.40 (0.18-0.88)   | 0.020   | 0.82 (0.29-2.26)   | 0.694  |
| Where did you usually get the information about the vaccination                                                                                                                                                       |     |    |                    |         |                    |        |
| Academic lectures. medical literature etc.                                                                                                                                                                            | 473 | 16 | 1.00 Ref.          |         |                    |        |
| Health professionals                                                                                                                                                                                                  | 446 | 23 | 0.66 (0.34-1.26)   | 0.201   | 0.85 (0.37-1.96)   | 0.711  |
| The Internet. the sites dedicated to COVID-19                                                                                                                                                                         | 445 | 20 | 0.75 (0.39-1.47)   | 0.404   | 2.07 (0.93-4.60)   | 0.075  |
| Friends. also the social media                                                                                                                                                                                        | 72  | 4  | 0.61 (0.20-1.87)   | 0.382   | 3.01 (0.72-12.66)  | 0.132  |
| Radio, television, press                                                                                                                                                                                              | 97  | 18 | 0.18 (0.09-0.37)   | <0.001  | 0.16 (0.06-0.39)   | <0.001 |
| How do you rate the reliability of the different sources information on a scale of 1-5 (where 1 is unreliable. 2- not very reliable. 3- I do not know. 4- reliable. 5- very reliable – results for 1+2: not-reliable) |     |    |                    |         |                    |        |
| Academic lectures. medical literature etc.                                                                                                                                                                            | 20  | 13 | 1.00 Ref.          |         |                    |        |
| Health professionals                                                                                                                                                                                                  | 70  | 15 | 3.03 (1.24-7.41)   | 0.013   | 0.16 (0.06-0.39)   | <0.001 |
| The Internet. the sites dedicated to COVID-19                                                                                                                                                                         | 491 | 23 | 13.88 (6.15-31.31) | <0.001  | 8.37 (1.97-35.65)  | 0.004  |
| Friends and the social media                                                                                                                                                                                          | 734 | 33 | 14.46 (6.62-31.56) | <0.001  | 0.15 (0.04-0.68)   | 0.013  |
| Radio, television, press                                                                                                                                                                                              | 615 | 37 | 10.80 (4.99-23.41) | <0.001  | 0.22 (0.05-1.00)   | 0.049  |
| How do you rate the reliability of the different sources information on a scale of 1-5 (where 1 is unreliable. 2- not very reliable. 3- I do not know. 4- reliable. 5- very reliable – results for 4+5: reliable)     |     |    |                    |         |                    |        |
| Academic lectures. medical literature etc.                                                                                                                                                                            | 894 | 32 | 1.00 Ref.          |         |                    |        |
| Health professionals                                                                                                                                                                                                  | 844 | 33 | 0.92 (0.56-1.50)   | 0.727   | 0.78 (0.16-3.79)   | 0.759  |
| The Internet. the sites dedicated to COVID-19                                                                                                                                                                         | 379 | 25 | 0.54 (0.32-0.93)   | 0.024   | 0.37 (0.08-1.70)   | 0.202  |
| Friends. also the social media                                                                                                                                                                                        | 123 | 14 | 0.31 (0.16-0.61)   | <0.001  | 0.92 (0.22-3.83)   | 0.904  |
| Radio, television, press                                                                                                                                                                                              | 212 | 5  | 1.52 (0.58-3.94)   | 0.388   | 1.35 (0.43-4.26)   | 0.609  |
| Should the vaccine be obligatory for the health professionals                                                                                                                                                         |     |    |                    |         |                    |        |
| Obligatory                                                                                                                                                                                                            | 743 | 6  | 1.00 Ref.          |         |                    |        |
| Voluntary                                                                                                                                                                                                             | 229 | 42 | 0.04 (0.02-0.10)   | <0.001  | 0.14 (0.06-0.29)   | <0.001 |
